# Supplementary material for: Conformal coating of superhydrophilic nickel iron phytic acid complex to boost BiVO4 photoanode solar water oxidation
Source: Royal Society of Chemistry journal article supplement (doi:10.1039/d4qi00989d), 2024-01-01
Supplement: d4qi00989d1.pdf [file d4qi00989d1.pdf]

## *Supporting Information*

# **Conformal coating of superhydrophilic nickel iron phytic acid complex to boost BiVO<sub>4</sub> photoanode solar water oxidation**

Ziqian Chen<sup>1, #</sup>, Baoxin Ge<sup>2, #</sup>, Jiaqi Bao<sup>1</sup>, Jinhui Zhang<sup>1</sup>, Chenming Yuan<sup>1</sup>, Hanjian Xu<sup>1</sup>, Wenbin Yang<sup>1</sup>, Ziqin Qiu<sup>1</sup>, Xiaoyue Yang<sup>1</sup>, Xingmao Jiang<sup>1</sup>, Xiang Wang<sup>1</sup>, Jie Zeng<sup>3</sup>, Biyi Chen<sup>1, \*</sup>, Changwei Shi<sup>1, 4\*</sup>

<sup>1</sup> School of Chemical Engineering & Pharmacy, Wuhan Institute of Technology, Wuhan 430205, China

<sup>2</sup> State Key Laboratory of Photocatalysis on Energy and Environment, College of Chemistry, Fuzhou University, Fuzhou 350116, China

<sup>3</sup> Pharmaceutical Research Institute, Wuhan Institute of Technology, Wuhan 430205, China

<sup>4</sup> Hubei Key Laboratory of Fuel Cells, Wuhan 430070, Hubei, P. R. China

E-mail: [cby@wit.edu.cn](mailto:cby@wit.edu.cn); [ShiChangwei@wit.edu.cn](mailto:ShiChangwei@wit.edu.cn)

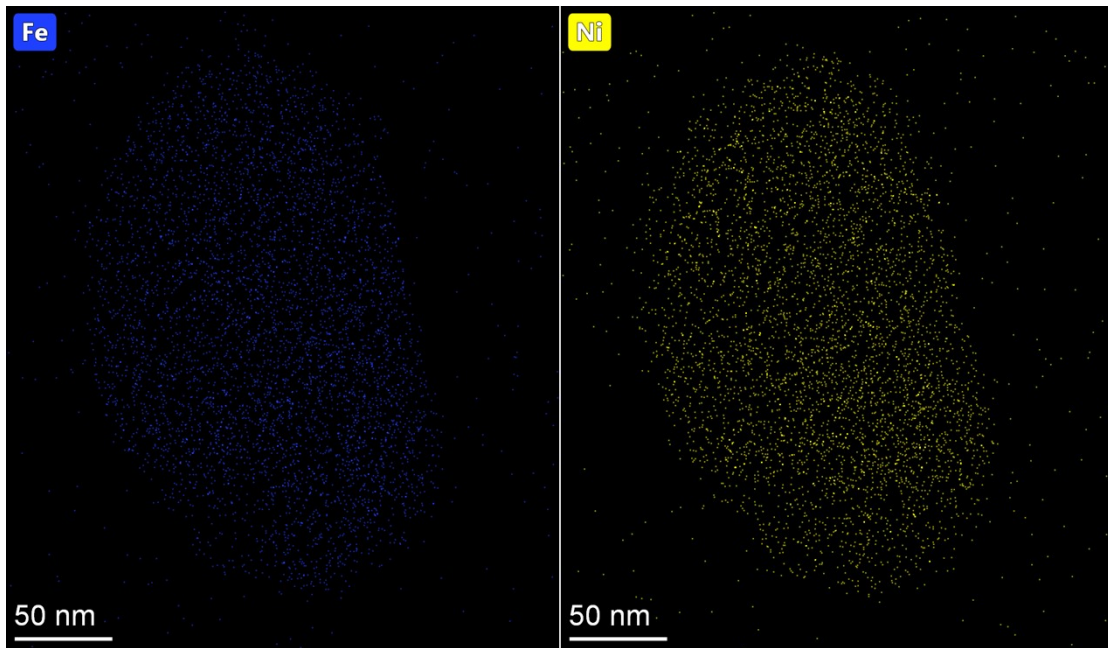

**Fig. S1.** The enlarged mapping images of the Fe and Ni in BiVO<sub>4</sub>@PA-NiFe photoanode.

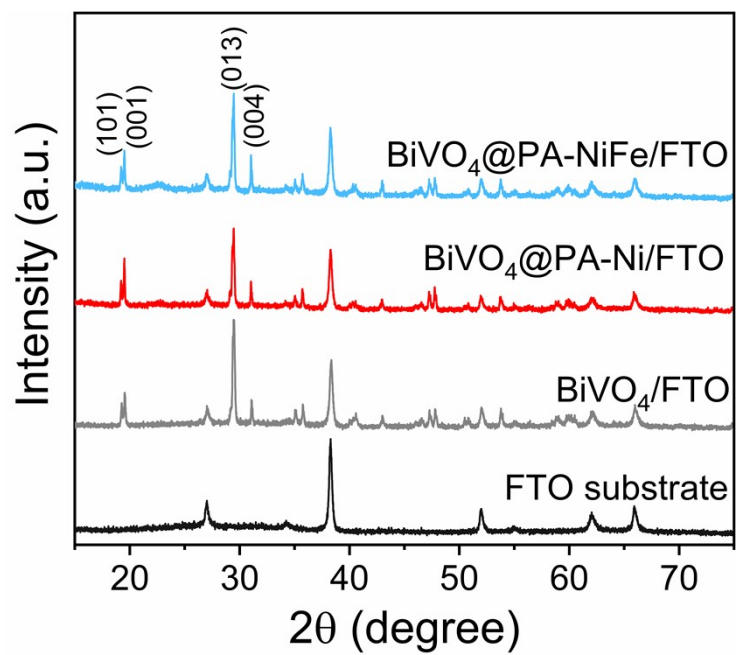

**Fig. S2.** The XRD patterns of the FTO substrate, BiVO<sub>4</sub>, BiVO<sub>4</sub>@PA-Ni and BiVO<sub>4</sub>@PA-NiFe photoanode.

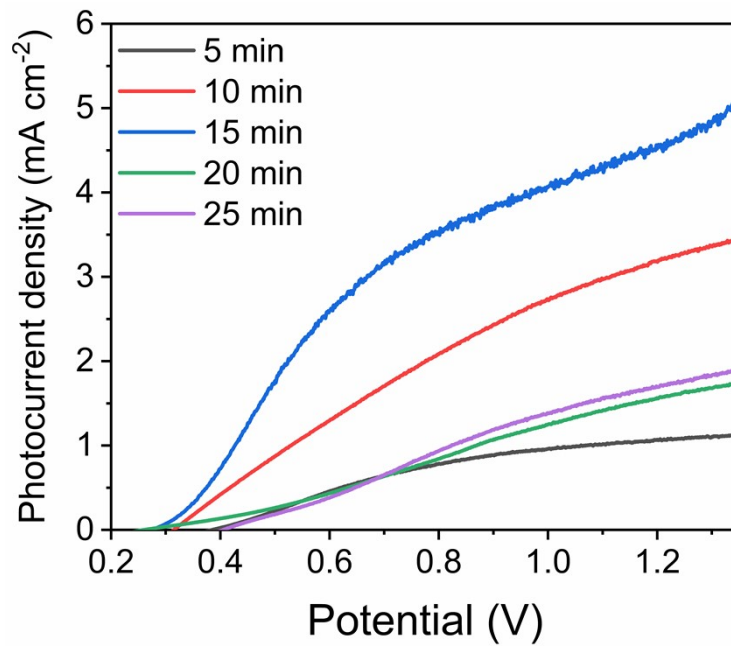

**Fig S3.** The LSV curves of the BiVO<sub>4</sub>@PA-NiFe photoanodes with the varying soaking times ranging from 5 – 25 min.

**Table S1.** The photocurrent density of the BiVO<sub>4</sub>@PA-NiFe compared with the previously reported photoanodes.

| Photoelectrode                                                                                    | Photocurrent density (mA cm <sup>-2</sup> ) at 1.23 V <sub>RHE</sub> | Ref. |
|---------------------------------------------------------------------------------------------------|----------------------------------------------------------------------|------|
| FeOOH/rGO/BiVO <sub>4</sub><br>Photoanode                                                         | 3.25                                                                 | 1    |
| Hierarchical mesoporous<br>SnO <sub>2</sub> /BiVO <sub>4</sub> photoanode                         | 3.98                                                                 | 2    |
| Conformal BiVO <sub>4</sub> /WO <sub>3</sub><br>nanobowl array<br>photoanode                      | 3.05                                                                 | 3    |
| Ni-Doped BiVO <sub>4</sub><br>photoanode                                                          | 3.02                                                                 | 4    |
| Ni <sub>3</sub> B/BiVO <sub>4</sub><br>photoelectrode                                             | 1.47                                                                 | 5    |
| WCoFe oxyhydroxide<br>/BiVO <sub>4</sub> photoanode                                               | 4.35                                                                 | 6    |
| BiVO <sub>4</sub> /N:NiFeOx<br>photoanodes                                                        | 6.4                                                                  | 7    |
| BiVO <sub>4</sub> /NiO/rGO<br>photoanode                                                          | 1.52                                                                 | 8    |
| Ni-NDAD/BiVO <sub>4</sub><br>photoelectrodes                                                      | 5.6                                                                  | 9    |
| Sb <sub>2</sub> S <sub>3</sub> -modified BiVO <sub>4</sub><br>photoanode                          | 1.1                                                                  | 10   |
| BiVO <sub>4</sub> -Ni/Co <sub>3</sub> O <sub>4</sub><br>photoanode                                | 2.23                                                                 | 11   |
| NiOOH/BiVO <sub>4</sub><br>photoanode                                                             | 1.2                                                                  | 12   |
| BiVO <sub>4</sub> /In/FeNi<br>photoanode                                                          | 4.0                                                                  | 13   |
| FeOOH/In-BiVO <sub>4</sub> (L)<br>photoanode                                                      | 5.02                                                                 | 14   |
| g-C <sub>3</sub> N <sub>4</sub> /ThO <sub>2</sub> @BiVO <sub>4</sub><br>heterojunction photoanode | 0.45                                                                 | 15   |

|                                                                                          |      |           |
|------------------------------------------------------------------------------------------|------|-----------|
| CoNi-MOFs/BiVO <sub>4</sub><br>photoanode                                                | 3.2  | 16        |
| Co <sub>2</sub> P <sub>2</sub> O <sub>7</sub> /BiVO <sub>4</sub> composite<br>photoanode | 3.93 | 17        |
| Zr-CoF <sub>2</sub> / BiVO <sub>4</sub><br>photoanode                                    | 3.6  | 18        |
| p-n heterostructured<br>BiVO <sub>4</sub> /g-C <sub>3</sub> N <sub>4</sub> Photoanode    | 4.63 | 19        |
| Ternary NiFePB-modified<br>ZnO/BiVO <sub>4</sub> heterojunction<br>photoanode            | 1.66 | 20        |
| BiVO <sub>4</sub> @PA-NiFe<br>photoanode                                                 | 4.58 | This work |

A pivotal metric in evaluating the efficiency of photoelectrochemical (PEC) water splitting is the photocurrent density, specifically at a potential of 1.23 V<sub>RHE</sub>. To highlight advancements in this field, we have systematically compiled data on the progress achieved with representative BiVO<sub>4</sub>-based photoelectrodes in PEC water splitting, as reported over the past five years. The aforementioned findings unambiguously indicate that the BiVO<sub>4</sub>@PA-NiFe photoanode exhibits performance that is distinctly superior, positioning it in a relatively advanced state compared to its counterparts.

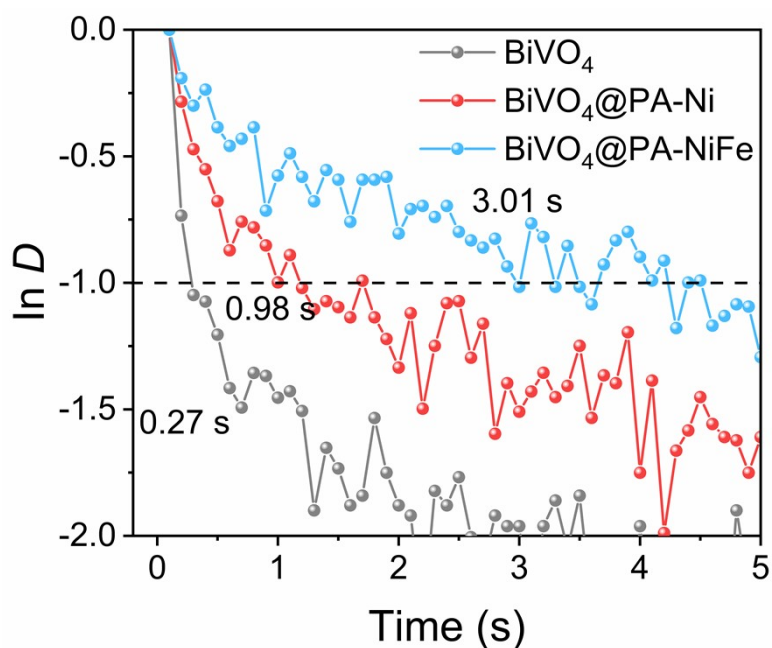

**Fig. S4.** Normalized transient current–time plots of the pristine BiVO<sub>4</sub>, BiVO<sub>4</sub>@PA-Ni and BiVO<sub>4</sub>@PA-NiFe photoanode.

Transient decay time  $\tau$  via a logarithmic plot of the parameter  $D$ , given by the equation:

$$D = (I_t - I_{st}) / (I_{in} - I_{st})$$

where  $I_t$ ,  $I_{st}$  and  $I_{in}$  are the photocurrent at time  $t$ (s), steady-state photocurrent and initial current, respectively.

The transient time constant ( $\tau$ ) is defined as the time at which  $\ln D = -1$ .

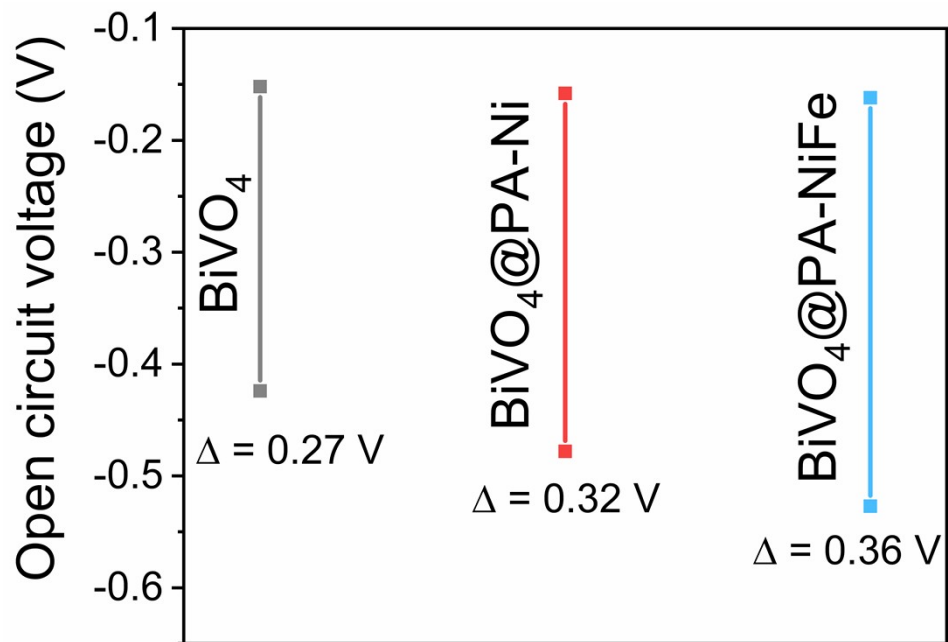

**Fig. S5.** The open circuit voltages of the  $\text{BiVO}_4$ ,  $\text{BiVO}_4@PA\text{-Ni}$  and  $\text{BiVO}_4@PA\text{-NiFe}$  photoanode.



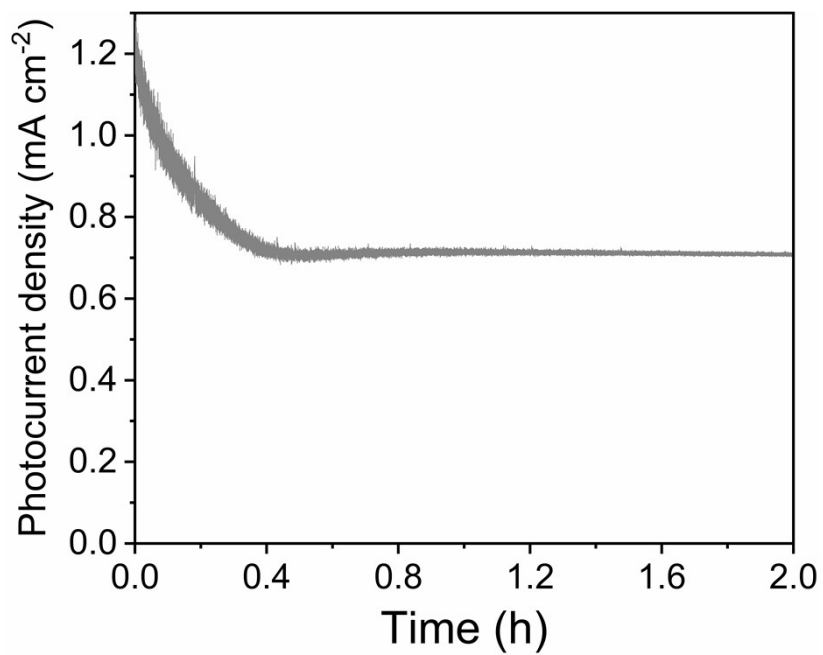

**Fig. S6.** The stability test of the pristine BiVO<sub>4</sub> photoanode.

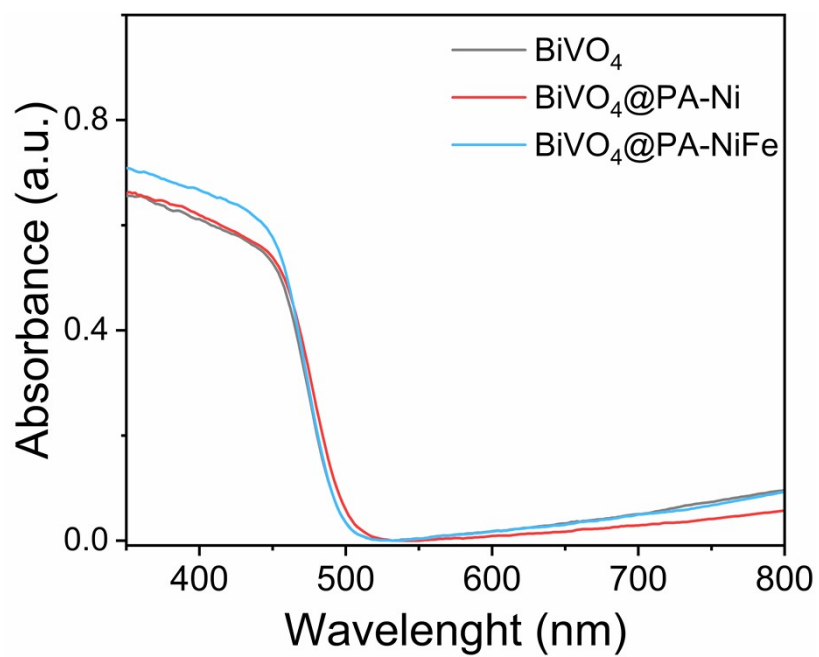

**Fig. S7.** The light absorption curve of the pristine BiVO<sub>4</sub>, BiVO<sub>4</sub>@PA-Ni, BiVO<sub>4</sub>@PA-NiFe photoanode.

## References

1. G. Zeng, L. Hou, J. Zhang, J. Zhu, X. Yu, X. Fu, Y. Zhu and Y. Zhang, FeOOH/rGO/BiVO<sub>4</sub> Photoanode for Highly Enhanced Photoelectrochemical Water Splitting Performance, *ChemCatChem*, 2020, **12**, 3769-3775.
2. A. Tavazohi, H. Abdizadeh and M. R. Golobostanfard, Hierarchical mesoporous SnO<sub>2</sub>/BiVO<sub>4</sub> photoanode decorated with Ag nanorods for efficient photoelectrochemical water splitting, *Int. J. Hydrogen Energy*, 2022, **47**, 18992-19004.
3. W. Zhang, M. Tian, H. Jiao, H.-Y. Jiang and J. Tang, Conformal BiVO<sub>4</sub>/WO<sub>3</sub> nanobowl array photoanode for efficient photoelectrochemical water splitting, *Chin. J. Catal.*, 2022, **43**, 2321-2331.
4. M. Chen, X. Chang, C. Li, H. Wang and L. Jia, Ni-Doped BiVO<sub>4</sub> photoanode for efficient photoelectrochemical water splitting, *J. Colloid Interface Sci.*, 2023, **640**, 162-169.
5. K. Xue, H. Zhu, X. Zhao, L. A. Rodrigues, D. A. Reddy, Y. Zhang and L. Yu, Ni<sub>3</sub>B modified BiVO<sub>4</sub> photoanodes for enhanced photoelectrochemical water splitting: The key role of Ni<sub>3</sub>B on reducing the water oxidation barrier, *Nano Res.*, 2023, **16**, 12043-12049.
6. W. Li, L. Du, Q. Liu, Y. Liu, D. Li and J. Li, Trimetallic oxyhydroxide modified 3D coral-like BiVO<sub>4</sub> photoanode for efficient solar water splitting, *Chem. Eng. J.*, 2020, **384**, 123323.
7. B. Zhang, S. Yu, Y. Dai, X. Huang, L. Chou, G. Lu, G. Dong and Y. Bi, Nitrogen-incorporation activates NiFeOx catalysts for efficiently boosting oxygen evolution activity and stability of BiVO<sub>4</sub> photoanodes, *Nat. Commun.*, 2021, **12**, 6969.
8. S. Bai, J. Han, K. Zhang, Y. Zhao, R. Luo, D. Li and A. Chen, rGO decorated semiconductor heterojunction of BiVO<sub>4</sub>/NiO to enhance PEC water splitting efficiency, *Int. J. Hydrogen Energy*, 2022, **47**, 4375-4385.
9. L. Wang, Z. Liu, X. Xu, Y. Jia, Q. Mei, F. Ding, J. Peng and Q. Wang,

- Efficient Solar Water Splitting via Enhanced Charge Separation of the BiVO<sub>4</sub> Photoanode, *ACS Appl. Energy Mater.*, 2022, **5**, 6383-6392.
10. Y. Lu, Z. Wang and J. Su, Sb<sub>2</sub>S<sub>3</sub> surface modification for improved photoelectrochemical water splitting performance of BiVO<sub>4</sub> photoanode, *Journal of Photonics for Energy*, 2021, **11**, 016502-016502.
  11. H. Bai, X. Li, Y. Zhao, W. Fan, Y. Liu, Y. Gao, D. Xu, J. Ding and W. Shi, Fabrication of BiVO<sub>4</sub>-Ni/Co<sub>3</sub>O<sub>4</sub> photoanode for enhanced photoelectrochemical water splitting, *Appl. Surf. Sci.*, 2021, **538**, 148150.
  12. X. Zhu, X. Liang, P. Wang, B. Huang, Q. Zhang, X. Qin and X. Zhang, Fabrication of large size nanoporous BiVO<sub>4</sub> photoanode by a printing-like method for efficient solar water splitting application, *Catal. Today*, 2020, **340**, 145-151.
  13. D. Yin, X. Ning, Q. Zhang, P. Du and X. Lu, Dual modification of BiVO<sub>4</sub> photoanode for synergistically boosting photoelectrochemical water splitting, *J. Colloid Interface Sci.*, 2023, **646**, 238-244.
  14. Y. Guo, Y. Wu, Z. Wang, D. Dai, X. Liu, Q. Zhang, Z. Wang, Y. Liu, Z. Zheng, H. Cheng, B. Huang, Y. Dai and P. Wang, Multi-strategy preparation of BiVO<sub>4</sub> photoanode with abundant oxygen vacancies for efficient water oxidation, *Appl. Surf. Sci.*, 2023, **614**, 156164.
  15. N. A. Mohamed, A. F. Ismail, T. S. Kiong and M. A. M. Teridi, Synergistic effects of ThO<sub>2</sub> on g-C<sub>3</sub>N<sub>4</sub>/BiVO<sub>4</sub> heterojunctions for enhanced photoelectrochemical (PEC) water splitting, *Int. J. Hydrogen Energy*, 2024, **59**, 1063-1079.
  16. S. Zhou, K. Chen, J. Huang, L. Wang, M. Zhang, B. Bai, H. Liu and Q. Wang, Preparation of heterometallic CoNi-MOFs-modified BiVO<sub>4</sub>: a steady photoanode for improved performance in photoelectrochemical water splitting, *Appl. Catal., B*, 2020, **266**, 118513.
  17. X. Wen, G. Zhou and J. Liu, Cobalt Pyrophosphate Nanosheets Effectively Boost Photoelectrochemical Water Splitting Efficiency of BiVO<sub>4</sub> Photoanodes, *Catal. Lett.*, 2024, **154**, 23-33.

18. K. Chen, L. Zhang, X. Huang, F. Zhang, G. Zhu and Q. Wang, Synergistic effect of atom doping and heterojunction: Promoted photoelectrochemical water splitting performance of Zr-CoF<sub>2</sub>/BiVO<sub>4</sub>, *J. Alloys Compd.*, 2023, **963**, 171262.
19. W. Ruyi, X. Guoliang, Y. Lei, D. Chonghai, C. Delin, Z. Miao and S. Zhaoqi, p-n Heterostructured BiVO<sub>4</sub>/g-C<sub>3</sub>N<sub>4</sub> Photoanode: Construction and Its Photoelectrochemical Water Splitting Performance, *J. Inorg. Mater.*, 2023, **38**, 87-96.
20. S. Bai, S. Jia, Y. Zhao, Y. Feng, R. Luo, D. Li and A. Chen, NiFePB-modified ZnO/BiVO<sub>4</sub> photoanode for PEC water oxidation, *Dalton Trans.*, 2023, **52**, 5760-5770.
